# Supplementary material for: Tuning the Langasite, La3SbZn3Si2O14, towards white light emission: synthesis, structure, SHG and photoluminescence studies
Source: Royal Society of Chemistry journal article supplement (doi:10.1039/d0dt03450a), 2020-01-01
Supplement: d0dt03450a1.pdf [file d0dt03450a1.pdf]

## Electronic Supporting Information

### **Tuning the Langasite, $\text{La}_3\text{SbZn}_3\text{Si}_2\text{O}_{14}$ Towards White Light Emission: Synthesis, Structure, SHG and Photoluminescence Studies**

Anupam Bhim, Ashutosh Mohanty and Srinivasan Natarajan\*<sup>a</sup>

<sup>a</sup>*Framework Solids Laboratory, Solid State and Structural Chemistry Unit, Indian Institute of  
Science, Bangalore – 560012, India.*

*E-mail: snatarajan@iisc.ac.in*

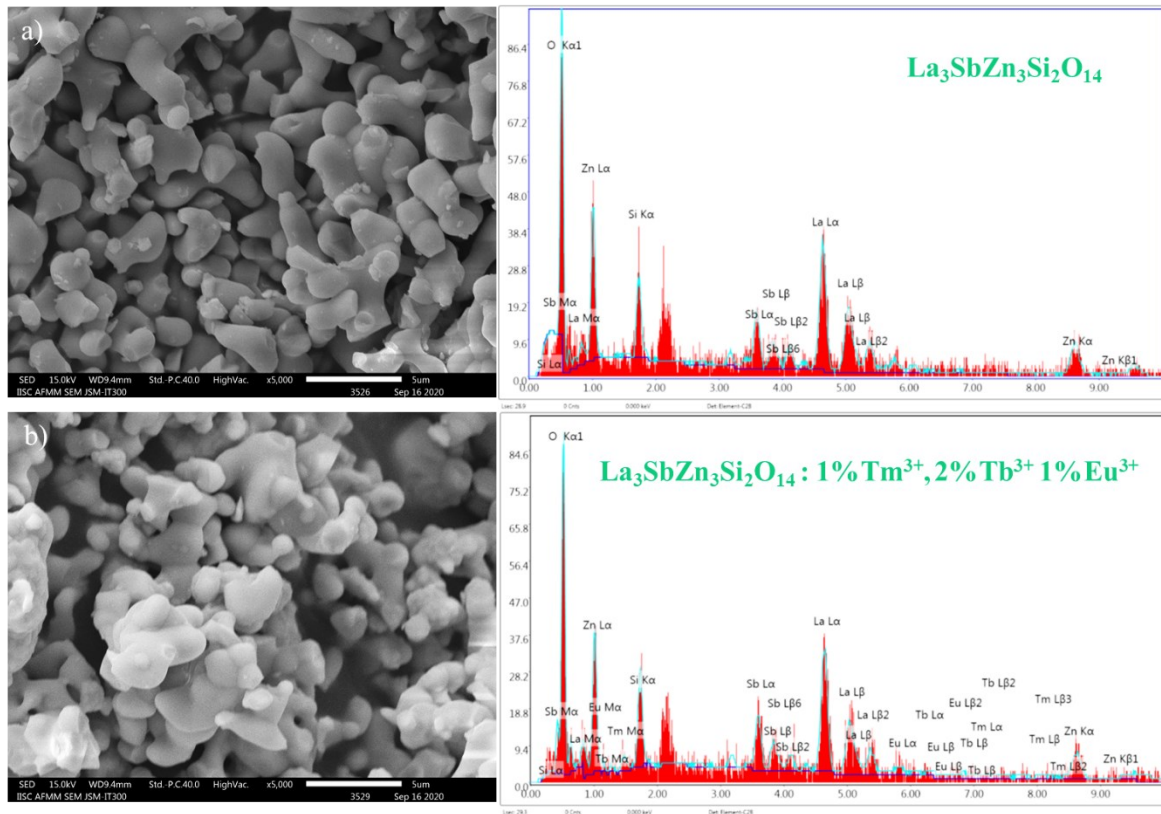

**Figure S1.** SEM image and corresponding EDX spectrum of (a)  $\text{La}_3\text{SbZn}_3\text{Si}_2\text{O}_{14}$  and rare-earth doped  $\text{La}_3\text{SbZn}_3\text{Si}_2\text{O}_{14}$ .

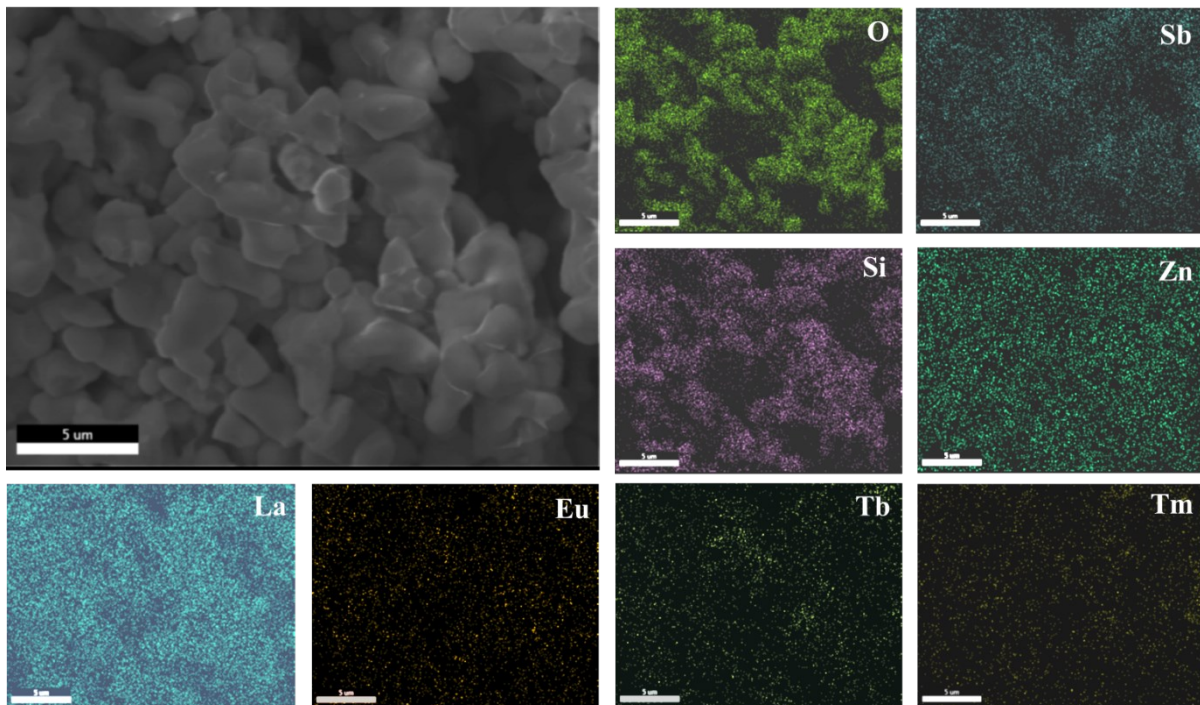

**Figure S2.** SEM-EDX elemental mapping for rare-earth doped  $\text{La}_3\text{SbZn}_3\text{Si}_2\text{O}_{14}$  (1% Tm $^{3+}$ , 2% Tb $^{3+}$ , 1% Eu $^{3+}$ )

**Table S1.** Crystallographic data for  $\text{La}_3\text{SbZn}_3\text{Si}_2\text{O}_{14}$  with trigonal structure.

| Atom | Site | x        | y        | z        | $U_{\text{iso}}(\text{\AA}^2)$ | Occupancy |
|------|------|----------|----------|----------|--------------------------------|-----------|
| La   | 3e   | 0.440468 | 0.0      | 0.0      | 0.015(2)                       | 1.0       |
| Sb   | 1a   | 0.0      | 0.0      | 0.0      | 0.011(2)                       | 1.0       |
| Zn   | 3f   | 0.750358 | 0.0      | 0.5      | 0.014(2)                       | 1.0       |
| Si   | 2d   | 0.333300 | 0.666700 | 0.490313 | 0.017(2)                       | 1.0       |
| O1   | 2d   | 0.333300 | 0.666700 | 0.785414 | 0.026(2)                       | 1.0       |
| O2   | 6g   | 0.492258 | 0.299794 | 0.634513 | 0.025(2)                       | 0.667     |
| O2   | 6g   | 0.492258 | 0.299794 | 0.634513 | 0.025(2)                       | 0.333     |
| O3   | 6g   | 0.223420 | 0.102585 | 0.236710 | 0.035(1)                       | 1.0       |

Space group  $P321$ :  $a = b = 8.219(2)$  \AA,  $c = 5.064(4)$  \AA,  $\alpha = \beta = 90^\circ$ ,  $\gamma = 120^\circ$ ;  
 Reliability Factors:  $R_p = 11.70\%$ ,  $R_{wp} = 12.62\%$ ,  $\chi^2 = 18.23$

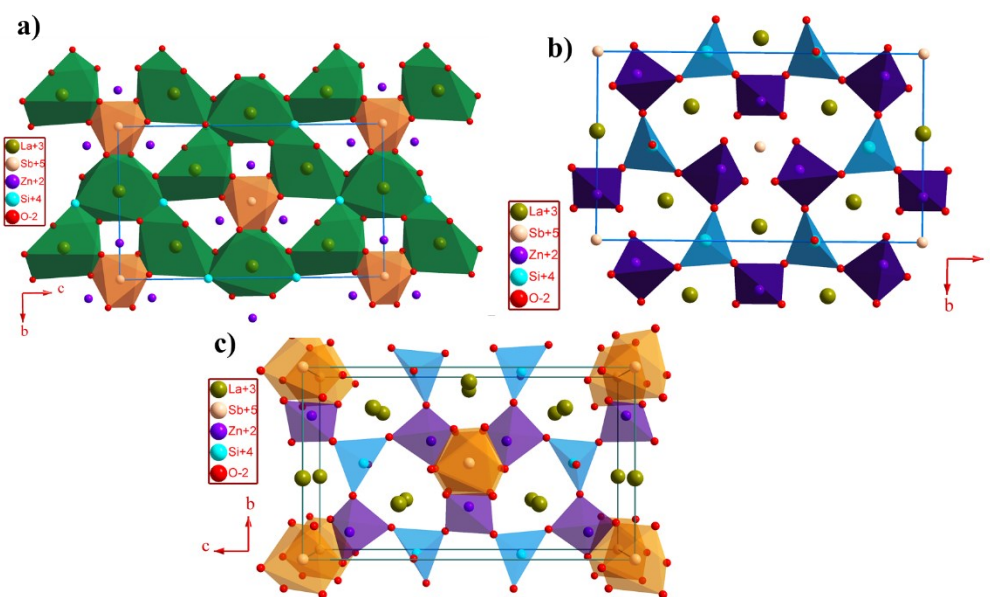

**Figure S3.** a) The polyhedral layer consisting of  $\text{SbO}_6$  octahedra and two types of La polyhedra, b) The  $\text{ZnO}_4$  and  $\text{SiO}_4$  tetrahedra are corner shared via oxygen atoms, c) Projection of the  $\text{La}_3\text{SbZn}_3\text{Si}_2\text{O}_{14}$  crystal structure upon the  $xz$  plane.

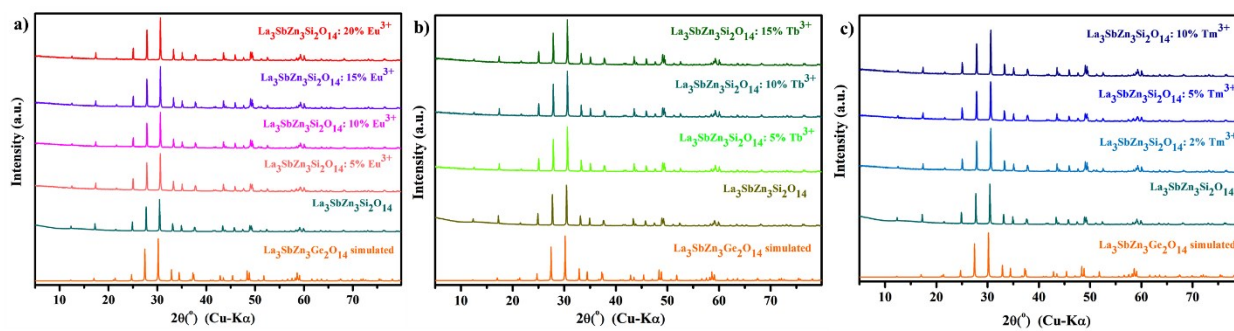

**Figure S4.** PXRD patterns of the rare earth doped  $\text{La}_{3-x}\text{M}_x\text{SbZn}_3\text{Si}_2\text{O}_{14}$ , ( $0 < x \leq 0.6$ ) for  $\text{M} = \text{Eu}$ , ( $0 < x \leq 0.5$ ) for  $\text{M} = \text{Tb}$  and ( $0 < x \leq 0.3$ ) for  $\text{M} = \text{Tm}$  compounds.

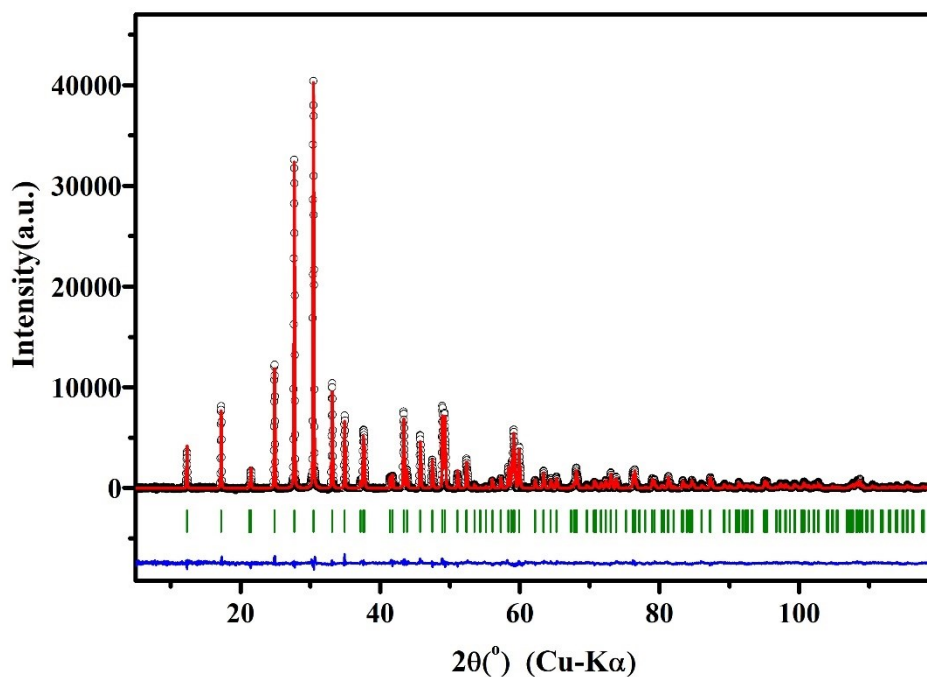

**Figure S5.** Rietveld refinement of rare-earth doped  $\text{La}_3\text{SbZn}_3\text{Si}_2\text{O}_{14}$  (1%  $\text{Tm}^{3+}$ , 2%  $\text{Tb}^{3+}$  and 1%  $\text{Eu}^{3+}$ ) from the PXRD data. The observed (O), calculated (red line), and difference (bottom blue line) profiles are shown. The vertical bars (|) indicate Bragg reflections.

**Table S2.** Crystallographic data for rare-earth doped  $\text{La}_3\text{SbZn}_3\text{Si}_2\text{O}_{14}$  (1%  $\text{Tm}^{3+}$ , 2%  $\text{Tb}^{3+}$  and 1%  $\text{Eu}^{3+}$ )

| Atom            | Site | x         | y        | z        | $U_{\text{iso}}(\text{\AA}^2)$ | Occupancy             |
|-----------------|------|-----------|----------|----------|--------------------------------|-----------------------|
| La1/Tm1/Tb1/Eu1 | 2a   | 0.0       | 0.436(2) | 0.0      | 0.022(2)                       | 0.98/0.005/0.01/0.005 |
| La2/Tm2/Tb2/Eu2 | 4c   | -0.002(2) | 0.286(4) | 0.287(1) | 0.020(4)                       | 0.98/0.005/0.01/0.005 |
| Sb              | 2a   | 0.0       | 0.0      | 0.0      | 0.021(1)                       | 1.0                   |
| Zn1             | 2a   | 0.5       | 0.744    | 0.0      | 0.030(5)                       | 1.0                   |
| Zn2             | 4c   | 0.493(1)  | 0.121(2) | 0.121(3) | 0.008(2)                       | 1.0                   |

|    |    |          |          |          |          |     |
|----|----|----------|----------|----------|----------|-----|
| Si | 4c | 0.457(4) | 0.514(2) | 0.167(4) | 0.024(6) | 1.0 |
| O1 | 4c | 0.745(7) | 0.464(1) | 0.168(2) | 0.027(2) | 1.0 |
| O2 | 4c | 0.679(1) | 0.857(4) | 0.370(5) | 0.011(2) | 1.0 |
| O3 | 4c | 0.719(4) | 0.135(2) | 0.421(2) | 0.038(3) | 1.0 |
| O4 | 4c | 0.604(2) | 0.141(3) | 0.264(1) | 0.076(1) | 1.0 |
| O5 | 4c | 0.228(4) | 0.978(2) | 0.112(3) | 0.062(5) | 1.0 |
| O6 | 4c | 0.205(1) | 0.342(2) | 0.426(4) | 0.007(2) | 1.0 |
| O7 | 4c | 0.213(4) | 0.688(6) | 0.450(2) | 0.008(4) | 1.0 |

Space group  $A121$ :  $a = 5.127(2)$  Å,  $b = 8.237(5)$  Å,  $c = 14.284(3)$  Å,  $\alpha = \gamma = 90^\circ$ ,  $\beta = 90.07^\circ$ ;

Reliability Factors:  $R_p = 3.48\%$ ,  $R_{wp} = 4.23\%$ ,  $\chi^2 = 4.86$ ;

Bond Lengths (Å): Zn–O = 1.959 (average), Sb–O = 1.996(1), Si–O = 1.579(2), La/Tm/Tb/Eu–O = 2.561 (average)

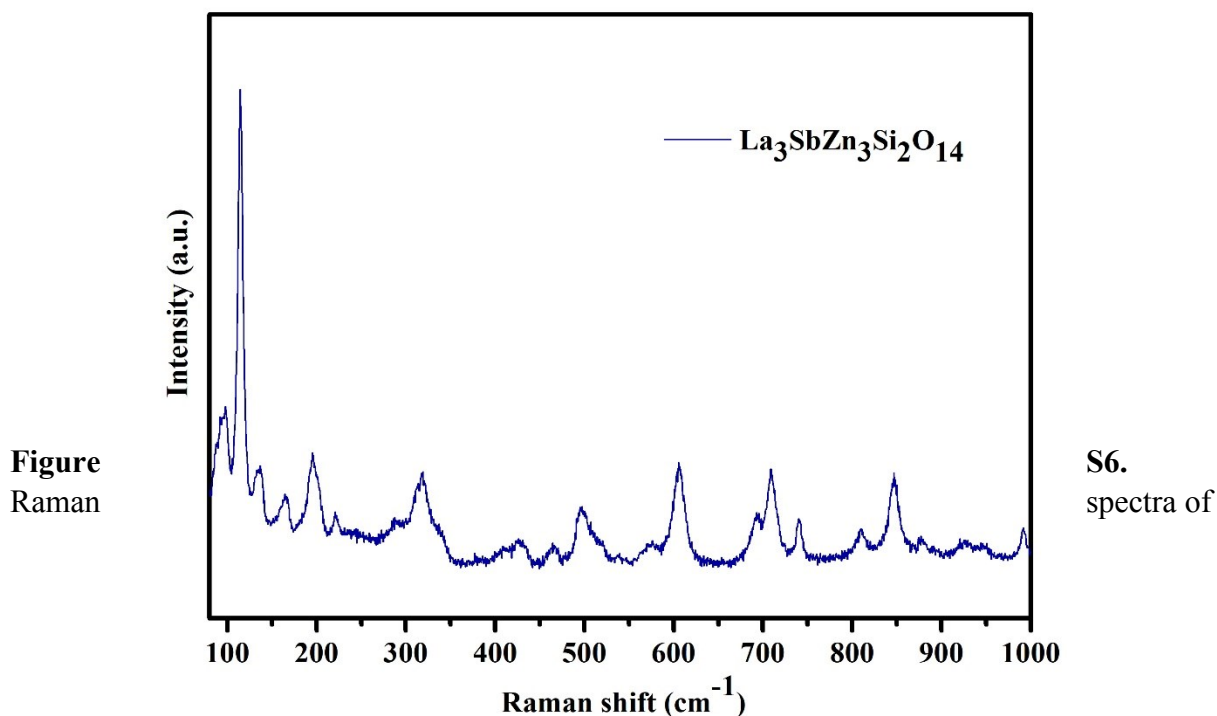

$\text{La}_3\text{SbZn}_3\text{Si}_2\text{O}_{14}$  at room temperature.

**Table S3.** SHG Responses, for the prepared compounds



| Compound                                                      | SHG at 1064 nm ( $\times$ KDP) |
|---------------------------------------------------------------|--------------------------------|
| $\text{La}_3\text{SbZn}_3\text{Si}_2\text{O}_{14}$            | 3.6                            |
| $\text{La}_3\text{SbZn}_3\text{Si}_2\text{O}_{14}$ (RE doped) | 3.4                            |

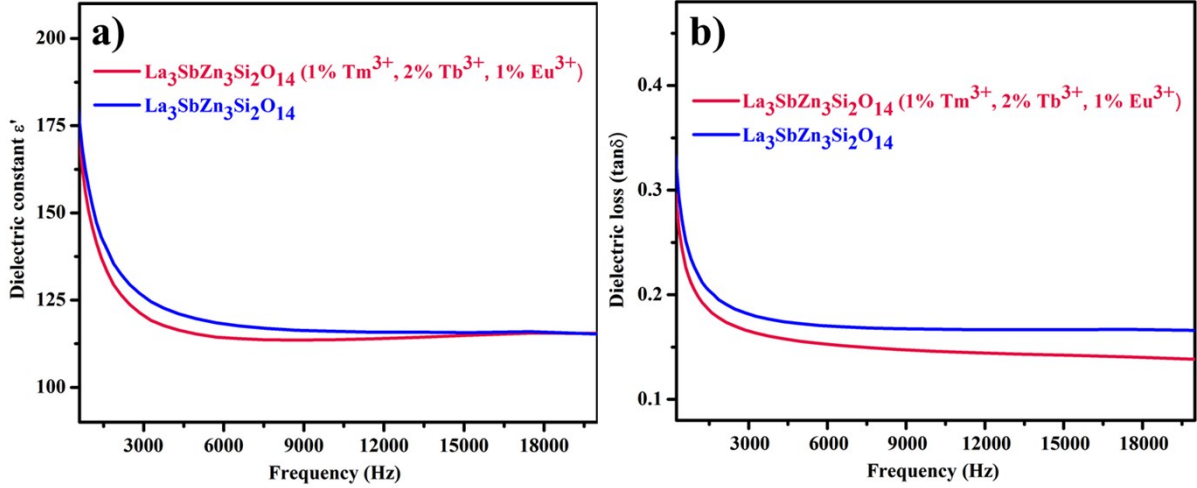

**Figure S7.** (a) The dielectric constant and (b) dielectric loss versus frequency plots for the Langasite compounds at room temperature.

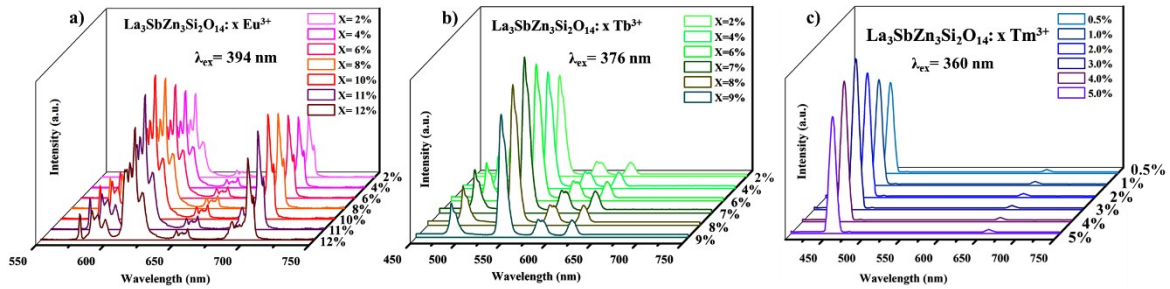

**Figure S8.** The variation of PL intensity as a function of the  $\text{Eu}^{3+}/\text{Tb}^{3+}/\text{Tm}^{3+}$  doping concentration.

**Table S4.** CIE chromaticity coordinates for  $\text{La}_3\text{SbZn}_3\text{Si}_2\text{O}_{14}$  doped with 3%  $\text{Tm}^{3+}$ , 7%  $\text{Tb}^{3+}$ , and 10%  $\text{Eu}^{3+}$  samples

| Compound                                                                  | x    | y    |
|---------------------------------------------------------------------------|------|------|
| $\text{La}_3\text{SbZn}_3\text{Si}_2\text{O}_{14}$ : 3% $\text{Tm}^{3+}$  | 0.14 | 0.10 |
| $\text{La}_3\text{SbZn}_3\text{Si}_2\text{O}_{14}$ : 7% $\text{Tb}^{3+}$  | 0.24 | 0.66 |
| $\text{La}_3\text{SbZn}_3\text{Si}_2\text{O}_{14}$ : 10% $\text{Eu}^{3+}$ | 0.62 | 0.34 |

**Table S5.** Comparison of the literature reported LED materials with the present Langasite host

| Phosphor                                                                                                                                  | Excitation Wavelength (nm) | Chromaticity coordinates (x,y) | CCT(K) | Quantum efficiency (%) | Ref.      |
|-------------------------------------------------------------------------------------------------------------------------------------------|----------------------------|--------------------------------|--------|------------------------|-----------|
| YPO <sub>4</sub> : (2%) Eu <sup>3+</sup> , (5%) Tb <sup>3+</sup> , (2%) Tm <sup>3+</sup>                                                  | 362                        | (0.315,0.273)                  | 6995   | -                      | 1         |
| CaMoO <sub>4</sub> : (4%) Eu <sup>3+</sup> , (4%) Tb <sup>3+</sup> , (4%) Tm <sup>3+</sup>                                                | 350                        | (0.340,0.330)                  | 5095   | -                      | 2         |
| LiGd(WO <sub>4</sub> ) <sub>2</sub> : (2%) Eu <sup>3+</sup> , (4%) Tb <sup>3+</sup> , (3%) Tm <sup>3+</sup>                               | 360                        | (0.343,0.327)                  | 4980   | 9                      | 3         |
| K <sub>3</sub> La(PO <sub>4</sub> ) <sub>2</sub> : (7%) Eu <sup>3+</sup> , (30%) Tb <sup>3+</sup> , (10%) Tm <sup>3+</sup>                | 358                        | (0.366,0.333)                  | 4072   | 38.2                   | 4         |
| NaYGeO <sub>4</sub> : (12%) Eu <sup>3+</sup> , (7%) Tb <sup>3+</sup> , (3%) Tm <sup>3+</sup>                                              | 369                        | (0.352,0.376)                  | 4842   | 40.2                   | 5         |
| Na <sub>2</sub> Y <sub>2</sub> B <sub>2</sub> O <sub>7</sub> : (0.5%) Eu <sup>3+</sup> , (60%) Tb <sup>3+</sup> , (0.5%) Ce <sup>3+</sup> | 365                        | (0.403,0.487)                  | 4095   | 77                     | 6         |
| NaGd(WO <sub>4</sub> ) <sub>2</sub> : (4%) Eu <sup>3+</sup> , (3%) Dy <sup>3+</sup> , (1%) Tm <sup>3+</sup>                               | 365                        | (0.364,0.322)                  | 4040   | -                      | 7         |
| Ca <sub>3</sub> Bi(PO <sub>4</sub> ) <sub>3</sub> : (9%) Eu <sup>3+</sup> , (10%) Tb <sup>3+</sup> , (4%) Tm <sup>3+</sup>                | 360                        | (0.338,0.329)                  | 5282   | -                      | 8         |
| La <sub>3</sub> SbZn <sub>3</sub> Si <sub>2</sub> O <sub>14</sub> : (1%) Eu <sup>3+</sup> , (2%) Tb <sup>3+</sup> , (1%) Tm <sup>3+</sup> | 360                        | (0.337,0.348)                  | 5309   | 16                     | This work |

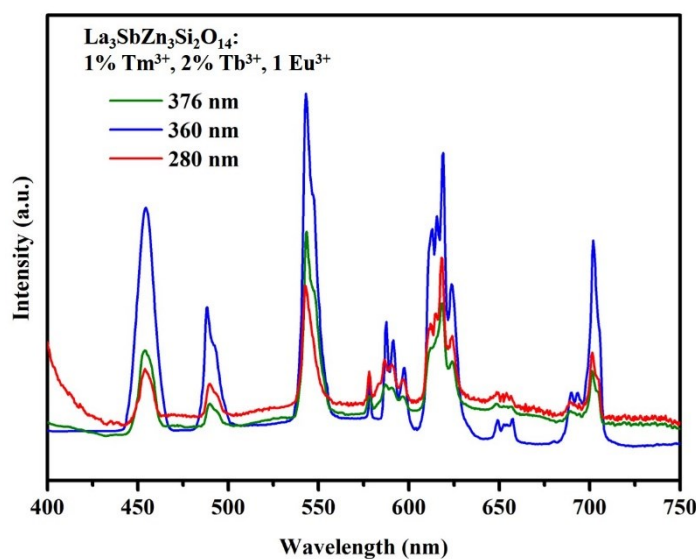**Figure S9.** The compound, La<sub>3</sub>SbZn<sub>3</sub>Si<sub>2</sub>O<sub>14</sub> (1% Tm<sup>3+</sup>, 2% Tb<sup>3+</sup> and 1 % Eu<sup>3+</sup>) excited at different wavelength.

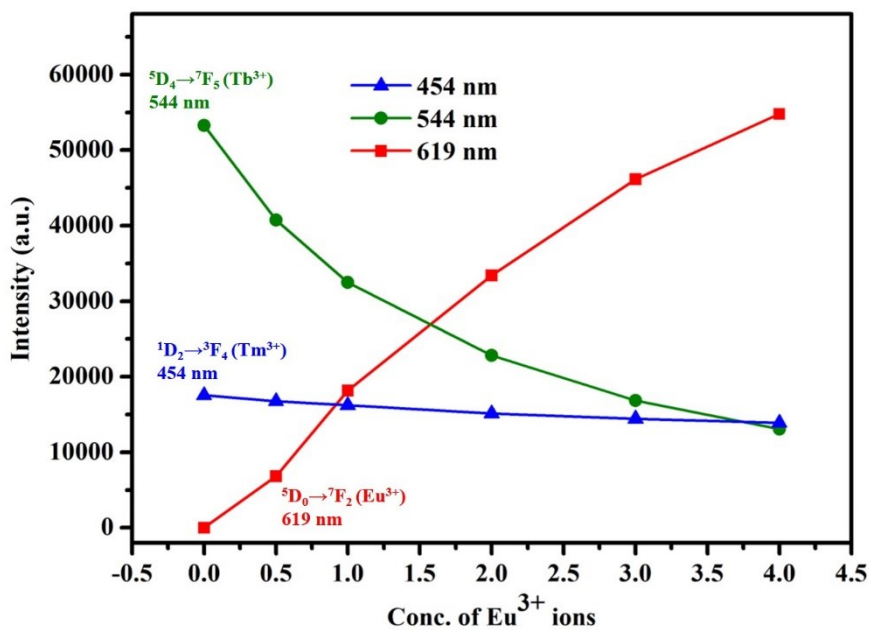

**Figure S10.** Variation of emission intensities at 454 nm ( $^1D_2 \rightarrow ^3F_4$ ), 544 nm ( $^5D_4 \rightarrow ^7F_5$ ), and 619 nm ( $^5D_0 \rightarrow ^7F_2$ ) vs.  $\text{Eu}^{3+}$  concentrations in  $\text{La}_3\text{SbZn}_3\text{Si}_2\text{O}_{14}$ : 1%  $\text{Tm}^{3+}$ , 2%  $\text{Tb}^{3+}$ ,  $x\%$   $\text{Eu}^{3+}$  ( $x = 0, 0.5, 1.0, 2.0, 3.0, 4.0$ ) compounds under 360 nm excitation.

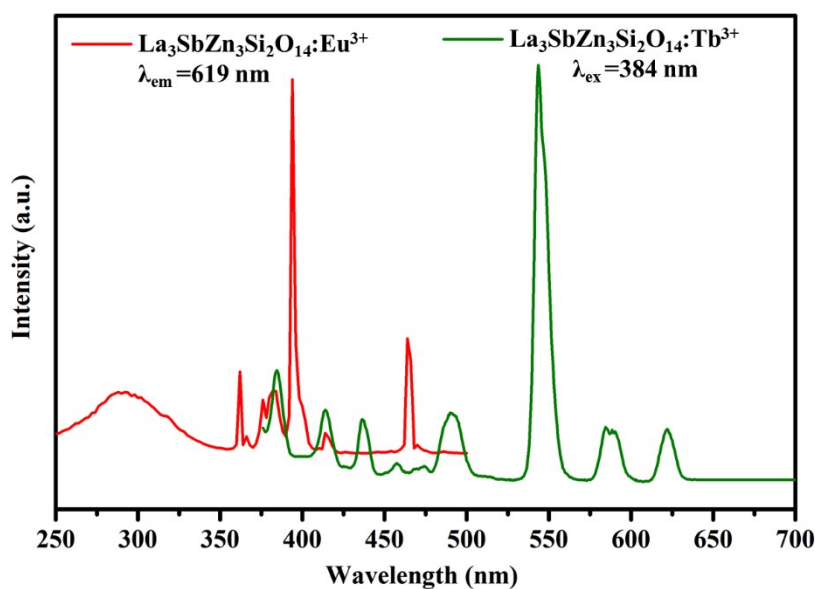

**Figure S11.** The spectral overlap between the PLE spectrum of  $\text{La}_3\text{SbZn}_3\text{Si}_2\text{O}_{14}$ :  $\text{Eu}^{3+}$  and PLE spectrum of  $\text{La}_3\text{SbZn}_3\text{Si}_2\text{O}_{14}$ :  $\text{Tb}^{3+}$  phosphors.



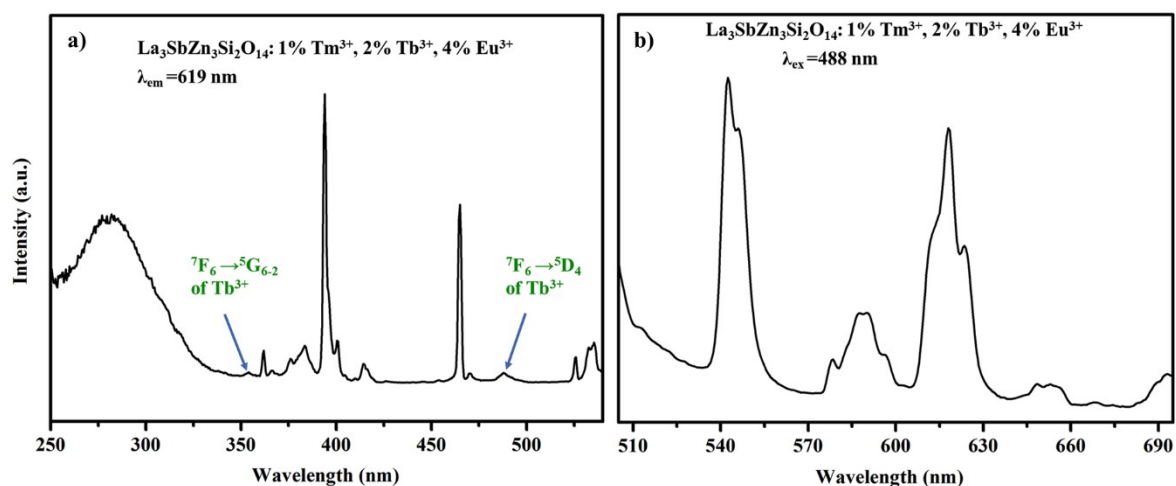

**Figure S12.** a) The excitation spectrum of  $\text{La}_3\text{SbZn}_3\text{Si}_2\text{O}_{14}:\text{1\% Tm}^{3+}, \text{2\% Tb}^{3+}, \text{4\% Eu}^{3+}$  sample monitored at 619 nm; b) The emission spectrum of the sample at the excitation of 488nm.

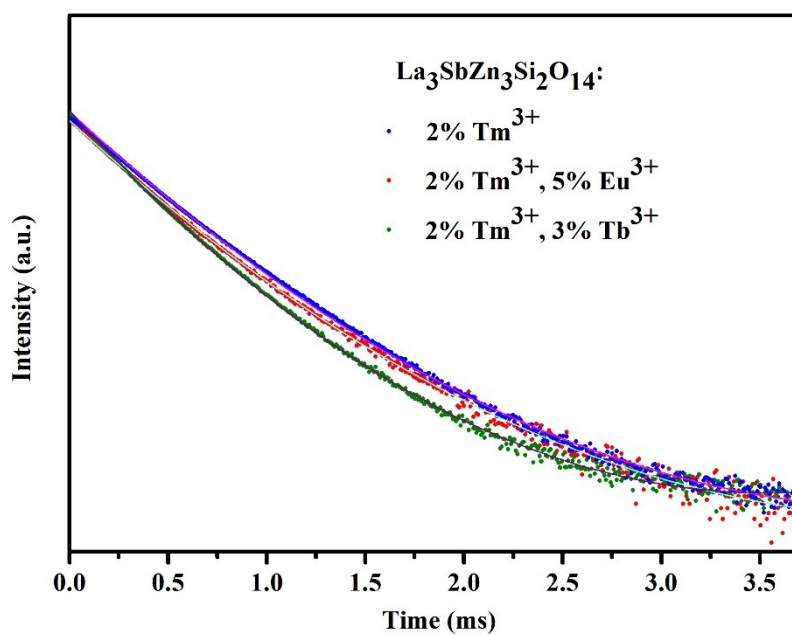

**Figure S13.** The decay curves for the luminescence of  $\text{Tm}^{3+}$  ions in  $\text{La}_3\text{SbZn}_3\text{Si}_2\text{O}_{14}:\text{2\% Tm}^{3+}; \text{2\% Tm}^{3+}, \text{5\% Eu}^{3+}; \text{2\% Tm}^{3+}, \text{3\% Tb}^{3+}$  samples (excited at 360 nm, monitored at 454 nm).

## References

1. a) Z. Yahiaoui, M.A. Hassairi, M. Dammak, E. Cavalli, *J. Alloys Compd.*, 2018, **763**, 56–61.
2. R. L. Tranquilin, L. X. Lovisa, C. R. R. Almeida, C. A. Paskocimas, M. S. Li, M. C. Oliveira, L. Gracia, J. Andres, E. Longo, F. V. Motta and M. R. D. Bomio, *J. Phys. Chem. C*, 2019, **123**, 18536–18550.
3. Y. Zhang, W. T. Gong, J. J. Yu, Y. Lin and G. L. Ning, *RSC Adv.*, 2015, **5**, 96272–96280.
4. X. Wu, W. Bai, O. Hai, Q. Ren, J. Zheng, Y. Ren, *Opt. Laser Technol.*, 2019, **115**, 176–185.
5. W. Zhao, X. Feng, B. Fan, *J. Mater. Sci.: Mater. Electron*, 2020, **31**, 14434–14442.
6. D. Wen and J. Shi, *Dalton Trans.*, 2013, **42**, 16621–16629.
7. Y. Liu, G. Liu, J. Wang, X. Dong and W. Yu, *Inorg. Chem.*, 2014, **53**, 11457–11466.
8. M. M. Jiao, N. Guo, W. Lu, Y. C. Jia, W. Z. Lv, Q. Zhao, B. Q. Shao and H. P. You, *Dalton Trans.*, 2013, **42**, 12395–12402.
